1 **Title:** Associations between physical activity and cognitive dysfunction in older companion  
2 dogs: Results from the Dog Aging Project

3  
4 **Authors:** Emily E. Bray<sup>1,2\*</sup>, David A. Raichlen<sup>3</sup>, Kiersten K. Forsyth<sup>4</sup>, Daniel E.L. Promislow<sup>5,6</sup>,  
5 Gene E. Alexander<sup>7,8,9,10,11,12†</sup>, Evan L. MacLean<sup>1,7,13,14†</sup>, & Dog Aging Project Consortium

6  
7 <sup>1</sup>Arizona Canine Cognition Center, School of Anthropology, University of Arizona, Tucson, AZ,  
8 USA

9 <sup>2</sup>Canine Companions for Independence, National Headquarters, Santa Rosa, CA, USA

10 <sup>3</sup>Human and Evolutionary Biology Section, Department of Biological Sciences, University of  
11 Southern California, Los Angeles, CA, USA

12 <sup>4</sup>College of Veterinary Medicine & Biomedical Sciences, Texas A & M University, College  
13 Station, TX, USA

14 <sup>5</sup>Department of Laboratory Medicine and Pathology, University of Washington School of  
15 Medicine, Seattle, WA, USA

16 <sup>6</sup>Department of Biology, University of Washington, Seattle, WA, USA

17 <sup>7</sup>Department of Psychology, University of Arizona, Tucson, AZ, USA

18 <sup>8</sup>Evelyn F. McKnight Brain Institute, University of Arizona, Tucson, AZ, USA

19 <sup>9</sup>Arizona Alzheimer's Consortium, Phoenix, AZ, USA

20 <sup>10</sup>Department of Psychiatry, University of Arizona, Tucson, AZ, USA

21 <sup>11</sup>Neuroscience Graduate Interdisciplinary Program, University of Arizona, Tucson, AZ, USA

22 <sup>12</sup>Physiological Sciences Graduate Interdisciplinary Program, University of Arizona, Tucson,  
23 AZ, USA

24 <sup>13</sup>Cognitive Science Program, University of Arizona, Tucson, AZ, USA

25 <sup>14</sup>College of Veterinary Medicine, University of Arizona, Tucson, AZ, USA

26 \*Corresponding author: [ebray@email.arizona.edu](mailto:ebray@email.arizona.edu)

27 †Contributed as senior authors

28  
29  
30  
31  
32  
33  
34  
35  
36  
37  
38  
39  
40

41

## Abstract

42 Canine Cognitive Dysfunction (CCD) is a form of dementia that shares many similarities  
43 with Alzheimer's disease. Given that physical activity is believed to reduce risk of Alzheimer's  
44 disease in humans, we explored the association between physical activity and cognitive health in  
45 a cohort of companion dogs, aged 6-18 years. We hypothesized that higher levels of physical  
46 activity would be associated with lower (i.e., better) scores on a cognitive dysfunction rating  
47 instrument and lower prevalence of dementia, and that this association would be robust when  
48 controlling for age, comorbidities, and other potential confounders. Our sample included 11,574  
49 companion dogs enrolled through the Dog Aging Project, of whom 287 had scores over the  
50 clinical threshold for CCD. In this observational, cross-sectional study, we used owner-reported  
51 questionnaire data to quantify dog cognitive health (via a validated scale), physical activity  
52 levels, health conditions, training history, and dietary supplements. We fit regression models  
53 with measures of cognitive health as the outcome, and physical activity—with several important  
54 covariates—as predictors. We found a significant negative relationship between physical activity  
55 and current severity of cognitive dysfunction symptoms (estimate = -0.10, 95% CI: -0.11 to -  
56 0.08,  $p < 0.001$ ), extent of symptom worsening over a 6-month interval (estimate = -0.07, 95%  
57 CI: -0.09 to -0.05,  $p < 0.001$ ), and whether a dog reached a clinical level of CCD (odds ratio =  
58 0.53, 95% CI: 0.45 to 0.63,  $p < 0.001$ ). Physical activity was robustly associated with better  
59 cognitive outcomes in dogs. Our findings illustrate the value of companion dogs as a model for  
60 investigating relationships between physical activity and cognitive aging, including aspects of  
61 dementia that may have translational potential for Alzheimer's disease. While the current study  
62 represents an important first step in identifying a relationship between physical activity and  
63 cognitive function, it cannot determine causality. Future studies are needed to rule out reverse  
64 causation by following the same dogs prospectively over time, and to evaluate causality by  
65 administering physical-activity interventions.

66

## Keywords

67 Canine, Canine Cognitive Dysfunction, Healthy aging, Physical activity

68

## Introduction

69 Alzheimer's disease is a devastating, age-related progressive neurodegenerative brain disorder  
70 that leads to cognitive decline and dementia. It is therefore a high priority for researchers to  
71 identify early, modifiable risk factors that can be targeted as interventions (Raichlen &  
72 Alexander, 2017; Yu et al., 2020). Over the past few decades, physical activity has emerged as  
73 one such factor that may play an important role in reducing the risk of Alzheimer's disease.  
74 There is evidence in humans that engaging in physical activity can have protective effects on  
75 cognitive function (Ahlskog, Geda, Graff-Radford, & Petersen, 2011; Santos-Lozano et al.,  
76 2016). In one large interventional study of adults with memory impairment, participating in a  
77 physical activity program for six months led to measurable increases in cognitive performance

78 over the next year and a half (Lautenschlager et al., 2008). In a different intervention, researchers  
79 documented an increase in hippocampal volume linked to aerobic exercise training (Erickson et  
80 al., 2011). A meta-analysis across 12 cohorts including thousands of participants also concluded  
81 that physical activity significantly protected against cognitive decline, even at low to moderate  
82 levels (Sofi et al., 2011). A recent study found that late-life physical activity was associated with  
83 higher presynaptic protein levels, known to positively affect cognition (Casaletto et al., 2021).  
84 Indeed, recent meta-analyses of randomized controlled trials using physical activity interventions  
85 reveal notable protective effects for dementia risk (Beckett, Ardern, & Rotondi, 2015; Xu et al.,  
86 2017).

87  
88 Several nonhuman species have been used as animal models for the cognitive impairments  
89 associated with Alzheimer's disease (Cotman & Berchtold, 2007). Similarly to the human  
90 studies, there is preliminary evidence from work in rodents (Berchtold, Castello, & Cotman,  
91 2010; Jahangiri, Gholamnezhad, & Hosseini, 2019; Van Praag, Shubert, Zhao, & Gage, 2005)  
92 and primates (Rhyu et al., 2010) that exercise enhances cognitive function and leads to  
93 neurogenesis, potentially protecting against the development of dementia. However, current  
94 model systems have limited translational potential due to reliance on genetically homogenous  
95 populations studied in artificial environments. To date, most comparative studies have been  
96 conducted using transgenic mouse models that attempt to mimic specific aspects of Alzheimer's  
97 disease neuropathology, including the pathological deposition of amyloid- $\beta$  (A $\beta$ ) plaques and  
98 neurofibrillary tangles with hyperphosphorylated tau (Jankowsky & Zheng, 2017). However,  
99 these models have typically focused on the least prevalent form in humans (Webster, Bachstetter,  
100 Nelson, Schmitt, & Van Eldik, 2014). No mouse model exhibits the full progression of  
101 Alzheimer's disease, and the supraphysiological overexpression of amyloid precursor protein  
102 transgenes may alter brain development in ways that limit translational potential (Elder, Gama  
103 Sosa, & De Gasperi, 2010). In addition, studies with laboratory mice have limited ability to  
104 model the complex gene  $\times$  environment interactions believed to underlie the heterogeneity  
105 observed in the development and progression of Alzheimer's disease (Chouliaras et al., 2010).

106  
107 Companion dogs have been proposed as a model for aging research with high translational  
108 potential (Creevy, Akey, Kaeberlein, & Promislow, 2022; Kaeberlein, Creevy, & Promislow,  
109 2016). Unlike laboratory populations, companion dogs are genetically heterogeneous, and share  
110 many important features with humans, including the same living environments, disease risks and  
111 burdens, patterns of actuarial aging, and access to a sophisticated health care system (Hoffman,  
112 Creevy, Franks, O'Neill, & Promislow, 2018). Dogs have also been suggested as a valuable  
113 natural complementary model for the age-related dementia of Alzheimer's disease. With  
114 advanced age, many dogs spontaneously develop a range of cognitive and behavioral  
115 impairments that resemble those associated with brain aging and Alzheimer's dementia. Dozens  
116 of studies have shown that signs of age-related neurodegeneration in dogs are often accompanied  
117 by cognitive dysfunction in learning and memory analogous to impairments often seen in aging

118 and Alzheimer's disease (Head, 2011, 2013; Milgram et al., 2004; Packer et al., 2018; Ruehl et  
119 al., 1995). Although the full complement of Alzheimer's disease neuropathology has yet to be  
120 consistently observed in any naturally occurring non-human animal model, Alzheimer-like  
121 pathology, e.g., A $\beta$  1-42, increases with age in companion dogs (Urfer et al., 2021) and has been  
122 described in the context of diffuse plaque deposition that has been related to cognitive  
123 decrements in older dogs (Cotman and Head, 2008). There is also preliminary evidence for  
124 tauopathy, another feature of Alzheimer-like pathology, in the brains of dogs diagnosed with  
125 canine cognitive dysfunction (Abey et al., 2021).

126  
127 In addition, similarly to humans, physical activity as part of enrichment programs in dogs has  
128 been associated with reductions in A $\beta$  Alzheimer-like pathology and improved cognitive  
129 performance (Cotman & Berchtold, 2007). Despite the strong potential for dog models of  
130 Alzheimer's disease, most studies to date have used small laboratory samples that do not  
131 capitalize on the many potential benefits of a companion dog model (e.g., large heterogeneous  
132 populations living in the same environments as humans).

133  
134 Previous exploratory work has looked broadly for associations between a wide range of  
135 characteristics and Canine Cognitive Dysfunction, finding that age as well as a single rating of  
136 physical activity were associated with Canine Cognitive Dysfunction (Yarborough, 2021).  
137 Building upon these findings, in the current observational study we focused our investigation on  
138 the relationship between physical activity and age-related impairments in cognitive function in  
139 companion dogs, using questionnaire data generated by The Dog Aging Project. Specifically,  
140 owners were asked to report the dog's lifestyle (not active to active) as well as the typical  
141 duration and intensity of their dog's physical activity. This dataset was analyzed alongside the  
142 owners' responses to a validated instrument (Salvin, McGreevy, Sachdev, & Valenzuela, 2011)  
143 assessing behaviors indicative of cognitive dysfunction and dementia (i.e., changes in social  
144 activity; challenges in navigation, searching, and recognition). We hypothesized that higher  
145 levels of physical activity would be associated with lower (i.e., better) scores on a cognitive  
146 dysfunction rating instrument, and decreased risk of dementia, and that this association would be  
147 robust when controlling for age, comorbidities, and potential confounders (e.g., joint  
148 supplements, motor impairments, exercise intolerance). Additionally, given that we know little  
149 about potential risk factors and protective effects for canine dementia, we also examined  
150 associations between several lifestyle factors (i.e., use of neuroprotective supplements and  
151 engagement in formal dog training activities) and categories of health conditions (i.e., neurologic  
152 conditions, sensory deficits, periodontal disease, and liver failure) with dementia outcomes.

## 153 **Methods**

### 154 *Subjects*

155 All dogs were members of the Dog Aging Project (DAP), a nationwide research study of  
156 companion dogs that aims to better understand the biological and environmental factors that  
157 impact health span and lifespan (Creedy et al., 2022; Kaeberlein et al., 2016). While the DAP is  
158 an ongoing longitudinal study, the data in the current study were cross-sectional, drawing on  
159 initial responses from owners whose dogs are enrolled in the first cohort. Owners completed the  
160 requested online surveys between December 26, 2019 and December 31, 2020 (Dog Aging  
161 Project, 2021). Study data were collected and managed using REDCap electronic data capture  
162 tools hosted through the DAP (Harris et al., 2019; Harris et al., 2009). These data are publicly  
163 available and housed on the Terra platform at the Broad Institute of MIT and Harvard.

#### 164 *Instruments*

165 Upon enrollment in the DAP, owners completed the Health and Life Experience Survey (HLES).  
166 In addition to collecting dog and owner demographics, this detailed questionnaire also asked  
167 owners to report on their dog's physical activity, environment, behavior, diet, medications and  
168 preventatives, and health status. For the current study, we were mainly interested in the data  
169 reflecting physical activity and health status.

170 After completing HLES, all participants were asked to participate in a second survey: the Canine  
171 Social and Learned Behavior Survey (CSLB). The intent of this survey was to measure owner-  
172 report of cognitive function. The CSLB, renamed by the DAP, is based on the Canine Cognitive  
173 Dysfunction Rating Scale (CCDR) (Salvin et al., 2011), with minor wording modifications to  
174 select items. The CCDR was presented to participants as the Canine Social and Learned  
175 Behavior Survey to avoid the negative connotations of the phrase 'cognitive dysfunction'. This  
176 instrument asks owners to indicate the frequency with which their dogs exhibit behaviors  
177 indicative of cognitive dysfunction and dementia (i.e., disengagement from social activity;  
178 difficulty in navigation, searching, and recognition). Based on owner responses, dogs receive a  
179 score that ranges from 16 to 80, where higher scores are indicative of worse cognitive function.  
180 This instrument was previously validated in a sample of dogs 8 years and older as a way of  
181 distinguishing dogs with CCD from those without (Salvin et al., 2011). In the current manuscript,  
182 we also explored its utility as a continuous measure.

183 During the study period, we received HLES responses from 27,541 unique DAP participants, of  
184 which 20,096 went on to also complete a CSLB.

#### 185 *Ethical Note*

186 The University of Washington IRB deemed that recruitment of dog owners for the DAP, and the  
187 administration and content of the DAP HLES, are human subjects research that qualifies for  
188 Category 2 exempt status (IRB ID no. 5988, effective 10/30/2018). No interactions between  
189 researchers and privately owned dogs occurred; therefore, IACUC oversight was not required.

#### 190 *Inclusion/Exclusion Criteria*

191 Given that cognitive decline is not typically observed in dogs until at least six years of age  
192 (Harvey, 2021; Packer et al., 2018; Studzinski et al., 2006), we specified age of inclusion as  $6 \leq$   
193 age < 18 years at the time of CSLB completion.

194 After applying this exclusion criterion, the final sample consisted of 11,574 dogs whose owners  
195 completed both the HLES and CSLB surveys. CSLB was always completed at least one week  
196 after completion of HLES. Most participants in the final sample (87.8%) completed CSLB  
197 within 3 months of completing HLES and always within one year (range: 7 to 352 days, mean:  
198 47.14 days).

### 199 *Outcome variable*

200 Our outcome of interest was the owner-reported symptoms of cognitive dysfunction of each dog,  
201 which we measured via three scores derived from CSLB responses. We first performed principal  
202 component analysis (PCA) on the 13 response items (see SI 1, Appendix A for survey  
203 questions). Parallel analysis recommended retaining two principal components. We used an  
204 oblimin rotation to allow correlation between the two PCs (see Table S1 in SI 1 for loadings).  
205 The first PC, which we called ‘change’, was loaded highly by questions regarding reported  
206 changes in cognitive dysfunction symptoms over the prior 6 months. The second PC, which we  
207 called ‘severity’, was loaded highly by items measuring reported current symptom severity.  
208 Finally, we analyzed Canine Cognitive Dysfunction (CCD) status as a binary exposure, wherein  
209 dogs who scored 50 or above were deemed to be above the diagnostic clinical threshold for  
210 CCD, and dogs below this score were not (Salvin et al., 2011).

### 211 *Predictor Variables*

212 Our main predictor of interest was physical activity. To calculate this variable for each dog, we  
213 performed PCA on three HLES-reported activity variables: lifestyle activity level (reported as  
214 not active, moderately active, or very active over the past year), average activity intensity level  
215 (reported as low: walking, medium: jogging, or vigorous: sprinting, such as playing fetch or  
216 frisbee), and average daily time spent physically active (reported in hours and minutes). Parallel  
217 analysis recommended retaining one principal component from these measures. This principal  
218 component explained 52% of the variance and was loaded positively by all three questions  
219 regarding physical activity. We used the scores from this component as our measure of physical  
220 activity (PA-score). Initial exploratory analyses suggested substantial and linear declines in  
221 physical activity with age (Fig S1 in SI 1).

222 We used information reported in HLES about diverse medical conditions with potential to  
223 influence cognitive function or physical activity level as covariates. Specifically, based on past  
224 literature, we expected the following health-related factors to be associated with risk of cognitive  
225 impairment in dogs: neurologic conditions, such as epilepsy (Hobbs et al., 2020; Watson, Packer,  
226 Rusbridge, & Volk, 2020; Winter, Packer, & Volk, 2018), sensory deficits in the visual and

227 auditory domains (Fischer et al., 2016; Ford et al., 2018; Szabó, Miklósi, & Kubinyi, 2018),  
228 periodontal disease (Dewey & Rishniw, 2021; Harding, Gonder, Robinson, Crean, & Singhrao,  
229 2017; Singhrao, Harding, Poole, Kesavalu, & Crean, 2015), and liver failure (Butterworth, 2016;  
230 Felipo, 2013).

231 We also created covariates for orthopedic conditions and exercise intolerance, which we  
232 expected to be negatively associated with physical activity levels. In the exercise intolerance  
233 category, we accounted for cardiac and respiratory conditions that negatively affect a dog's  
234 ability to exercise—either by rendering the dogs unable to exert themselves physically, or  
235 because the prevailing veterinary advice for the diagnosis is restricted activity.

236 Lastly, to control for other factors potentially influencing general health, we created variables for  
237 whether dogs had been diagnosed with certain systemic disorders, including cancer and those  
238 affecting the kidneys and the endocrine system.

239 For each of the health condition categories described above, all participants were assigned a  
240 binary score (affected/unaffected). Dogs were considered 'affected' if their owner reported them  
241 to have one or more relevant conditions within a given category. We only included chronic  
242 conditions that were likely to affect the relevant systems, and thus excluded temporary  
243 conditions that, given standard recommended medical care, would only temporarily affect the  
244 relevant systems. For example, in the orthopedic category, we scored hip dysplasia as an  
245 'affected' condition, as it is a long-term issue that affects mobility, whereas fractured bones were  
246 not included because the most likely prognosis is complete recovery and therefore the impact on  
247 physical activity is temporary. For cataracts and ligament ruptures, we only included dogs as  
248 affected (in the sensory impairment and orthopedic categories, respectively) if the diagnosis was  
249 *not* followed by surgery. Our curated list of health conditions included in each covariate category  
250 can be found in SI 2, and the full list of health conditions that owners were asked about is listed  
251 in SI 3.

252 Additionally, we created covariates for lifestyle factors that preliminary evidence suggests might  
253 have ameliorating or protective effects for physical activity and/or cognition. If dogs received  
254 glucosamine and/or other joint supplements daily, they were considered 'affected' in the joint  
255 supplement category (McCarthy et al., 2007). If dogs received omega 3, vitamins, probiotics,  
256 antioxidants, taurine, carnitine, and/or coenzyme Q10 daily, they were considered 'affected' in  
257 the neuroprotective supplement category (Heath, Barabas, & Craze, 2007; Mad'ari, Farbakova,  
258 & Žilka, 2017; Milgram et al., 2004; Pan, Kennedy, Jönsson, & Milgram, 2018). Finally, we also  
259 created a variable accounting for whether a dog had a history of training (Bray et al., 2022),  
260 given intriguing preliminary evidence that this sort of enrichment is linked to delay in cognitive  
261 decline (Bray et al., 2022; Milgram, Siwak-Tapp, Araujo, & Head, 2006; Szabó et al., 2018).  
262 Training history was determined according to what the owner reported as the dog's primary or

263 secondary activity (e.g., service dogs, agility dogs, and dogs trained for field trials vs.  
264 pets/companion; see SI 1, Appendix B for full details).

265 A summary of the demographic variables, incidence of health conditions, physical activity  
266 levels, training history, and dietary supplement use within our sample is reported in Table 1,  
267 broken down by participants who met the diagnostic score for CCD ( $n = 287$ ) and those who did  
268 not ( $n = 11,287$ ).

### 269 *Statistical Methods*

270 All statistical analyses were carried out in R v.4.0.3 (R Development Core Team, 2016).

271 We fit three tiers of models for each of our outcome variables. In our first tier of analysis, we  
272 built a base model that included only key predictor variables (physical activity and age) and a  
273 minimal set of covariates. The effect of age was modelled using a second-order polynomial term  
274 because preliminary exploratory analyses revealed a non-linear relationship between age and the  
275 cognitive outcomes (see Fig S2 in SI 1). The other covariates included in our base models  
276 included dog sex (female, intact; female, spayed; male, intact; male, castrated), dog size (lbs),  
277 and owner age (18-24, 25-34, 35-44, 45-54, 55-64, 65-74, 75+). For models using the categorical  
278 measure of dementia status as the outcome, the owner age variable was collapsed to two levels  
279 (18-54, 55+) and dog sex was collapsed to two levels (male, female) to avoid small cell sizes.

280 In our second tier of analysis, we built a model that included all the variables from our base  
281 model as well as hypothesis-driven confounders and risk or protective factors. The additional  
282 variables for these models included whether a given dog exhibited sensory impairments (e.g.,  
283 visual and/or auditory), motor impairments (e.g., orthopedic challenges), exercise intolerance  
284 (e.g., cardiac and/or respiratory challenges), neurological conditions other than dementia (i.e.,  
285 dogs with a reported diagnosis of dementia or senility—and no other neurological conditions—  
286 were considered ‘unaffected’ in this category), periodontal disease, liver disease, as well as  
287 whether they were currently receiving joint and/or neuroprotective supplements, and whether  
288 they had a history of training. For models using the categorical measure of dementia as the  
289 outcome, liver disease was removed as a covariate due to small cell sizes when stratifying on this  
290 covariate.

291 Finally, in the third tier of analysis, we added the remaining, non-hypothesis driven covariates,  
292 for health condition categories including endocrine disease, kidney disease, and cancer.

293 We applied our three-tier modeling approach to the three different outcome variables, using  
294 linear regressions for symptom severity and recent symptom change, and a logistic regression for  
295 CCD status. Continuous outcomes (severity and change) were subjected to an inverse rank  
296 normal transformation to better meet the assumptions of linear modeling, and then standardized  
297 to have a mean of 0 and standard deviation of 1, to facilitate interpretation. We fit a total of nine



298 statistical models (three for each dependent measure). To identify the best model for each  
299 outcome, we compared the Akaike information criterion scores across models.

300 We also performed some sensitivity analyses. To determine if any observed associations would  
301 still hold in a cognitively healthy population, we re-ran our original analyses but removed all  
302 dogs above the CCD threshold ( $n = 11,287$ , Tables S2 and S3 in SI 1). Given that over half of  
303 our sample was comprised of mixed breed dogs ( $n = 6,027$  (52%)), a highly heterogenous group,  
304 we did not control for breed in our main analyses. Thus, in a follow-up set of sensitivity  
305 analyses, we first repeated all models but eliminated all purebred dogs from the sample ( $n =$   
306  $6,027$ , Table S4-S6 in SI 1). Additionally, we then repeated all models but only included  
307 purebred dogs—using breeds with at least 10 dogs in the dataset ( $n = 5,167$  dogs from 92 breeds;  
308 Table S7 in SI 1), and, for the CCD model, at least one member of the breed above the CCD  
309 threshold ( $n = 3,945$  dogs from 53 breeds; Table S8 in SI 1)—and added breed as a covariate  
310 (Table S4-S6 in SI 1). Finally, based on the possibility that CSLB scores below 20 may be  
311 implausible, we re-ran the models from our main analyses, excluding the subset of dogs with a  
312 score of 19 and lower ( $n = 11,368$ ; see SI 1 for details).

## 313 **Results**

314 For all outcomes, results from each of the three tiers of analysis displayed the same pattern but  
315 the fully adjusted model fit the best in all cases, as assessed by the lowest Akaike information  
316 criterion (Tables 2-4). Therefore, the results reported below are derived from the models  
317 including all candidate covariates.

318 As expected, all three cognitive outcomes were negatively impacted by age, with effect of age  
319 increasing at older ages (Fig 1). In all models, there was also a significant relationship between  
320 physical activity and cognitive outcomes (Fig 2).

321 In the severity model, we found a significant negative association between physical activity and  
322 severity of cognitive symptoms, whereby high levels of activity were linked to lower (i.e., better)  
323 scores on the CSLB (Fig 2; Table 2). We also identified associations between two other  
324 hypothesized protective factors (training history and neuroprotective supplements), in which  
325 both a history of training and daily consumption of neuroprotective supplements were associated  
326 with better cognitive outcomes. For the final hypothesized protective factor (joint supplements),  
327 the beta coefficient was negative but not statistically significant. We also observed that poor  
328 health in certain domains was a risk factor for symptom severity. For our medical covariates,  
329 beta coefficients were positive and statistically significant for six categories of conditions  
330 (sensory impairment, endocrine, orthopedic, neurological, cancer, and periodontal) and positive  
331 but not statistically significant for the final three categories of conditions (kidney, liver, and  
332 exercise intolerance; Fig 2; Table 2). Results were similar in the analysis that excluded dogs  
333 above the CCD threshold (Table S2 in SI 1), suggesting that these relationships hold below the  
334 clinical cutoff for a diagnosis of dementia. Results were also similar in secondary analyses

335 including only mixed breed dogs and dogs from the most common breeds (see Table S4 in SI 1).  
336 Across all three models, the negative association between symptom severity and our main  
337 exposure of interest (physical activity) remained significant, as did the negative associations with  
338 training history and neuroprotective supplements and the positive associations with two  
339 categories of medical conditions (sensory impairment and orthopedic). Finally, removing dogs  
340 with reported CSLB scores less than 20 did not change our findings (Table S9 in SI 1).

341 In the symptom change model, we again found a significant negative relationship between  
342 physical activity and reported change in cognitive symptoms as recalled by owners over the prior  
343 6-month period, whereby higher levels of activity were linked to less owner-reported cognitive  
344 decline across the preceding six months (Fig 2; Table 3). We also identified a negative  
345 association with one of our other hypothesized protective factors (training history), in which  
346 dogs with an extensive training history exhibited less cognitive decline in the preceding six  
347 months. For the two other hypothesized protective factors (neuroprotective and joint  
348 supplements), the beta coefficients were near zero and not statistically significant. We also found  
349 evidence that poor health in certain domains was a risk factor for symptoms worsening over a 6-  
350 month period. For our medical covariates, beta coefficients were positive and statistically  
351 significant for five categories of medical conditions (sensory impairment, orthopedic,  
352 neurological, cancer, and periodontal), and not statistically significant for four categories of  
353 conditions (kidney, endocrine, exercise intolerance, and liver). Results were similar when  
354 performing our original analyses but removing all dogs above the CCD threshold (Table S3 in SI  
355 1), suggesting that these relationships hold below the clinical cutoff for a diagnosis of dementia.  
356 Results were also similar in secondary analyses including only mixed breed dogs and dogs from  
357 the most common breeds (see Table S5 in SI 1): across all three models, the negative association  
358 between symptom change and physical activity remained significant, as did the positive  
359 associations with three categories of medical conditions (sensory impairment, orthopedic, and  
360 periodontal). Finally, removing dogs with reported CSLB scores less than 20 did not change our  
361 findings (Table S10 in SI 1).

362 In the CCD status model, we found that higher levels of physical activity were associated with  
363 lower odds of being over the diagnostic threshold for CCD (Fig 2; Table 4). The adjusted odds  
364 ratio was 0.53 (95% CI: 0.45 to 0.63) and statistically significant for physical activity, but there  
365 were no significant associations with the other hypothesized protective factors (training history,  
366 neuroprotective supplements, and joint supplements). We also found evidence that poor health in  
367 certain domains was associated with CCD, whereby individuals with CCD were also likely to  
368 have other owner-reported health issues. For our medical covariates, we observed OR > 1.0 and  
369 statistically significant for three categories of medical conditions (sensory impairment, kidney,  
370 and endocrine) with none of the other six categories of conditions (orthopedic, neurological,  
371 cancer, liver, exercise intolerance, and periodontal) reaching statistical significance. Results were  
372 similar in secondary analyses including only mixed breed dogs and dogs from the most common  
373 breeds (see Table S6 in SI 1 for full report): across all three models, the negative association

374 between being over the diagnostic threshold for CCD and physical activity remained significant,  
375 as did the positive association with sensory impairment. Removing dogs with reported CSLB  
376 scores less than 20 did not change our findings (Table S11 in SI 1).

## 377 **Discussion**

378 We investigated the relationship between physical activity and cognitive health in a sample of  
379 over 10,000 companion dogs. By exploring this relationship in a large population living in an  
380 environment shared with humans, we aimed to gain insight regarding factors associated with  
381 healthy cognitive aging and to identify potential modifiable risk factors that may prevent  
382 cognitive dysfunction and dementia (Deckers et al., 2015).

383 Across all models, we observed robust associations between physical activity and cognitive  
384 health. Physical activity was significantly negatively associated with three metrics of cognitive  
385 dysfunction: current symptom severity, extent of worsening over a 6-month interval, and whether  
386 a dog had reached a clinical threshold for CCD. These results held when controlling for basic  
387 demographic factors (weight, sex, and age of the dog, as well as age of the owner), hypothesis-  
388 driven confounders and risk factors related to lifestyle (joint-enhancing supplements,  
389 neuroprotective supplements, and training history) and health (sensory impairments, exercise  
390 intolerance, orthopedic conditions, neurological conditions other than dementia, periodontal  
391 disease, liver conditions), and other general health conditions (endocrine conditions, kidney  
392 failure, and cancer).

393 Furthermore, sensitivity analyses indicated that the association between physical activity and  
394 cognitive function held even when dogs who met the CCD threshold were removed from the  
395 sample. Thus, even in non-clinical cohorts physical activity may be associated with measurable  
396 cognitive benefits in older dogs, and/or declines in cognitive function may be associated with  
397 declines in owner-reported physical activity.

398 In addition to the association between physical activity and cognition, our analyses revealed  
399 relationships between cognitive health and several other health and lifestyle variables. For  
400 example, one of the strongest observed associations was between CSLB scores indicating worse  
401 cognitive health and sensory impairment, in line with the findings of a similar questionnaire-  
402 based study of 1,300 companion dogs (Szabó et al., 2018). While it may be that sensory  
403 impairment is a confounder (i.e., owners may mistakenly attribute a change in behavior to  
404 cognitive dysfunction when really it is the result of failing vision and/or audition), there is also  
405 evidence in the human literature that such impairments are potential risk factors for dementia  
406 (Hwang et al., 2020; Luo et al., 2018; Maharani, Dawes, Nazroo, Tampubolon, & Pendleton,  
407 2020).

408 We also found a positive association between taking daily neuroprotective supplements (e.g.,  
409 fish oil) and cognitive symptom severity. This finding is consistent with some clinical studies in

410 dogs (Pan, Kennedy, et al., 2018; Pan, Landsberg, et al., 2018) and humans (Fotuhi, Mohassel, &  
411 Yaffe, 2009; Nolan, Mulcahy, Power, Moran, & Howard, 2018), although other studies in the  
412 human literature have found no effect (Danthiir et al., 2018; van de Rest et al., 2008). A potential  
413 limitation of this finding is that owners who are motivated to provide potentially neuroprotective  
414 supplements may be biased in their evaluation of their pet's dementia symptoms. However, these  
415 supplements (e.g., fish oil) are also recommended by veterinarians for numerous other perceived  
416 benefits (e.g., heart health, coat shine, allergy relief, and pain management), so we do not know  
417 what expectations owners have regarding their potential effects on cognition.

418 Finally, we identified an association between two of our cognitive outcomes—symptom severity  
419 and cognitive change over the last 6 months—and training, whereby dogs who had a history of  
420 training were less likely to exhibit signs of cognitive decline. This finding is consistent with the  
421 idea that both physical exercise *and* mental exercise can have a beneficial impact on the brain  
422 (Marx, 2005; Raichlen & Alexander, 2017; Raichlen et al., 2020). Furthermore, this measure  
423 accounted for previous activity (i.e., history of training versus current training regimen) and so,  
424 given the timeline, cannot be readily explained by reverse causality. While the literature in  
425 humans (Kramer, Bherer, Colcombe, Dong, & Greenough, 2004) and laboratory animals (Birch  
426 & Kelly, 2019), including beagles (Milgram et al., 2005; Milgram et al., 2006), supports the idea  
427 that enrichment can lead to better cognitive functioning in old age, only one other study has  
428 demonstrated this relationship in companion dogs (Szabó et al., 2018). Nonetheless, this  
429 relationship has interesting potential parallels to associations between cognitive training and  
430 educational attainment in the context of dementia and Alzheimer's disease risk in humans (Xu et  
431 al., 2016).

432 Our study has several notable limitations. First, despite the large sample size and wide range of  
433 covariates able to be accounted for, we cannot rule out unmeasured confounding. Second, all  
434 data were owner-reported and thus subject to potential pitfalls associated with self-report.  
435 Despite this limitation, the survey used in our analyses is known to have excellent diagnostic  
436 accuracy and test-retest reliability (Salvin et al., 2011). Third, we categorized dogs as either  
437 'affected' or 'not affected' on each health covariate based on owner-reported diagnoses when  
438 filling out the HLES survey. However, HLES does not capture information about a condition's  
439 severity. While all dogs were included in each category if they had a relevant diagnosis, in reality  
440 that condition might not have had a measurable impact. For example, we included all dogs with  
441 heart disease in our 'exercise intolerance' category; in moderate to severe cases, this condition  
442 will inevitably impact a dog's ability to exercise (and likely lead to a veterinary recommendation  
443 of exercise restriction). However, in mild cases, this condition may have minimal impact on a  
444 dog's ability to exercise.

445 The most important limitation of our study is that we cannot determine causality given the  
446 observational, cross-sectional nature of the design. Given existing knowledge about the  
447 relationships between physical activity and cognitive function, it is plausible that higher rates of

448 physical activity play a causal role in reducing risk of later-life cognitive impairment in dogs.  
449 However, the observed association between physical activity and cognitive outcomes could also  
450 indicate that as dogs decline cognitively, it causes them to become less active. Finally, there is a  
451 third possibility of unmeasured confounding, whereby neither physical activity nor cognitive  
452 decline have causal effects on one another. The fact that our sensitivity analyses revealed an  
453 association between CSLB scores and physical activity even in clinically ‘normal’ dogs suggests  
454 that the first explanation is more likely; however, future research incorporating additional study  
455 designs, including interventions and the analysis of longitudinal data, will be critical for causal  
456 inferences in this domain.

457 In conclusion, our findings indicate that signs of cognitive decline in dogs, and the likelihood of  
458 developing CCD, increase with age. Furthermore, the associations presented here are consistent  
459 with the hypothesis that physical activity may partially mitigate these risks, although they are  
460 also consistent with the hypothesis that cognitively impaired dogs exercise less, or that  
461 unidentified confounding variables influence changes in both physical activity and cognitive  
462 function. We also identified several categories of medical conditions that were associated with  
463 cognitive dysfunction: sensory deficits showed the strongest associations, and there was also  
464 some evidence to suggest associations with endocrine disorders, neurological conditions,  
465 orthopedic impairments, periodontal disease, cancer, and kidney disorders. Across a subset of  
466 our outcome measures, training history and neuroprotective supplements were associated with  
467 reduced cognitive impairment. However, in support of our key hypothesis, physical activity was  
468 the only lifestyle factor that was robustly associated with reduced risk of cognitive dysfunction  
469 across all three of our outcome measures. These findings establish the value of companion dogs  
470 as a model for relationships between physical activity and cognitive aging, and lay a foundation  
471 for future longitudinal studies, including randomized controlled trials, with this valuable  
472 population.

#### 473 **Author Contributions**

474 All authors contributed to writing – review & editing. E.B.: conceptualization, methodology,  
475 formal analysis, data curation, writing – original draft, and supervision. D.R.: conceptualization  
476 and methodology. K.F.: data curation. D.P.: conceptualization, project administration, and  
477 funding acquisition. G.A.: conceptualization and methodology. E.M.: conceptualization,  
478 methodology, formal analysis, writing – original draft, visualization, and supervision. DAP  
479 consortium: resources. G.A. and E.M. both contributed as senior authors.

#### 480 **Acknowledgments**

481 The Dog Aging Project thanks study participants, their dogs, and community veterinarians for  
482 their important contributions.

#### 483 **Sources of Funding**

484 The Dog Aging Project is supported by U19AG057377 and R24AG073137 from the National  
485 Institute on Aging, a part of the National Institutes of Health, and by additional grants and  
486 private donations. The authors would also like to acknowledge support by the National Institute  
487 on Aging (P30AG019610, P30AG072980, R56AG067200, R01AG064587, R01AG072445), the  
488 state of Arizona and Arizona Department of Health Services, and the Evelyn F. McKnight Brain  
489 Institute. The content is solely the responsibility of the authors and does not necessarily represent  
490 the official views of the National Institutes of Health.

#### 491 **Conflicts of interest/Competing interests**

492 The authors declare no competing interests.

#### 493 **Data availability statement**

494 These data are housed on the Terra platform at the Broad Institute of MIT and Harvard.

#### 495 **Code availability statement**

496 This study did not use custom code or mathematical algorithms.

#### 497 **Supplementary Information captions**

498 **Supplementary Information 1.** Supplementary tables and appendices.

499 **Supplementary Information 2.** Summary of HLES items that contributed to each of the  
500 following covariates in our full model, along with the total number of unique affected dogs from  
501 our sample: sensory impairment, orthopedic, exercise intolerance, neurological, periodontal,  
502 liver, endocrine, kidney, and cancer.

503 **Supplementary Information 3.** A list of all 288 specific health conditions from HLES; Dog  
504 Aging Project owners were asked to report, for each condition, whether their dog had been  
505 diagnosed. Each of the broad general categories also had an ‘other’ option where owners could  
506 write in an answer.

#### 507 **References**

- 508 Abey, A., Davies, D., Goldsbury, C., Buckland, M., Valenzuela, M., & Duncan, T. (2021).  
509 Distribution of tau hyperphosphorylation in canine dementia resembles early Alzheimer’s  
510 disease and other tauopathies. *Brain Pathology*, 31(1), 144-162.  
511 Ahlskog, J. E., Geda, Y. E., Graff-Radford, N. R., & Petersen, R. C. (2011). Physical exercise as  
512 a preventive or disease-modifying treatment of dementia and brain aging. *Mayo Clinic*  
513 *Proceedings*, 86(9), 876-884.

- 514 Beckett, M. W., Ardern, C. I., & Rotondi, M. A. (2015). A meta-analysis of prospective studies  
515 on the role of physical activity and the prevention of Alzheimer's disease in older adults.  
516 *BMC Geriatrics*, *15*(1), 1-7.
- 517 Berchtold, N. C., Castello, N., & Cotman, C. W. (2010). Exercise and time-dependent benefits to  
518 learning and memory. *Neuroscience*, *167*(3), 588-597.
- 519 Birch, A. M., & Kelly, Á. M. (2019). Lifelong environmental enrichment in the absence of  
520 exercise protects the brain from age-related cognitive decline. *Neuropharmacology*, *145*,  
521 59-74.
- 522 Bray, E. E., Zheng, Z., Tolbert, M. K., McCoy, B. M., Kaeberlein, M., & Kerr, K. F. (2022).  
523 Once-daily feeding is associated with better health in companion dogs: Results from the  
524 Dog Aging Project. *bioRxiv*. doi:10.1101/2021.11.08.467616
- 525 Butterworth, R. F. (2016). The concept of "the inflamed brain" in acute liver failure: mechanisms  
526 and new therapeutic opportunities. *Metabolic Brain Disease*, *31*(6), 1283-1287.
- 527 Casaletto, K., Ramos-Miguel, A., VandeBunte, A., Memel, M., Buchman, A., Bennett, D., &  
528 Honer, W. (2021). Late-life physical activity relates to brain tissue synaptic integrity  
529 markers in older adults. *Alzheimer's & dementia*. doi:10.1002/alz.12530
- 530 Chouliaras, L., Sierksma, A., Kenis, G., Prickaerts, J., Lemmens, M., Brasnjevic, I., . . . De  
531 Baets, M. (2010). Gene-environment interaction research and transgenic mouse models  
532 of Alzheimer's disease. *International Journal of Alzheimer's Disease*, *2010*.  
533 doi:10.4061/2010/859101
- 534 Cotman, C. W., & Berchtold, N. C. (2007). Physical activity and the maintenance of cognition:  
535 learning from animal models. *Alzheimer's & Dementia*, *3*(2), S30-S37.
- 536 Creevy, K. E., Akey, J. M., Kaeberlein, M., & Promislow, D. E. (2022). An open science study  
537 of ageing in companion dogs. *Nature*, *602*(7895), 51-57.
- 538 Danthiir, V., Hosking, D. E., Nettelbeck, T., Vincent, A. D., Wilson, C., O'Callaghan, N., . . .  
539 Wittert, G. A. (2018). An 18-mo randomized, double-blind, placebo-controlled trial of  
540 DHA-rich fish oil to prevent age-related cognitive decline in cognitively normal older  
541 adults. *The American journal of clinical nutrition*, *107*(5), 754-762.
- 542 Deckers, K., van Boxtel, M. P., Schiepers, O. J., de Vugt, M., Muñoz Sánchez, J. L., Anstey, K.  
543 J., . . . Kivipelto, M. (2015). Target risk factors for dementia prevention: a systematic  
544 review and Delphi consensus study on the evidence from observational studies.  
545 *International journal of geriatric psychiatry*, *30*(3), 234-246.
- 546 Dewey, C. W., & Rishniw, M. (2021). Periodontal disease is associated with cognitive  
547 dysfunction in aging dogs: A blinded prospective comparison of visual periodontal and  
548 cognitive questionnaire scores. *Open Veterinary Journal*, *11*(2), 210-216.
- 549 Dog Aging Project. (2021). *Dog Aging Project - 2020 Curated Data Release, version 1.1 [Data*  
550 *file and codebook]*. <https://app.terra.bio/> : Terra at the Broad Institute of MIT and  
551 Harvard.
- 552 Elder, G. A., Gama Sosa, M. A., & De Gasperi, R. (2010). Transgenic mouse models of  
553 Alzheimer's disease. *Mount Sinai Journal of Medicine: A Journal of Translational and*  
554 *Personalized Medicine: A Journal of Translational and Personalized Medicine*, *77*(1),  
555 69-81.
- 556 Erickson, K. I., Voss, M. W., Prakash, R. S., Basak, C., Szabo, A., Chaddock, L., . . . White, S.  
557 M. (2011). Exercise training increases size of hippocampus and improves memory.  
558 *Proceedings of the National Academy of Sciences*, *108*(7), 3017-3022.

- 559 Felipo, V. (2013). Hepatic encephalopathy: effects of liver failure on brain function. *Nature*  
560 *Reviews Neuroscience*, 14(12), 851-858.
- 561 Fischer, M. E., Cruickshanks, K. J., Schubert, C. R., Pinto, A. A., Carlsson, C. M., Klein, B. E., .  
562 . . Tweed, T. S. (2016). Age-related sensory impairments and risk of cognitive  
563 impairment. *Journal of the American Geriatrics Society*, 64(10), 1981-1987.
- 564 Ford, A. H., Hankey, G. J., Yeap, B. B., Golledge, J., Flicker, L., & Almeida, O. P. (2018).  
565 Hearing loss and the risk of dementia in later life. *Maturitas*, 112, 1-11.
- 566 Fotuhi, M., Mohassel, P., & Yaffe, K. (2009). Fish consumption, long-chain omega-3 fatty acids  
567 and risk of cognitive decline or Alzheimer disease: a complex association. *Nature*  
568 *Reviews Neurology*, 5(3), 140-152.
- 569 Harding, A., Gonder, U., Robinson, S. J., Crean, S., & Singhrao, S. K. (2017). Exploring the  
570 association between Alzheimer's disease, oral health, microbial endocrinology and  
571 nutrition. *Frontiers in Aging Neuroscience*, 9, 398.
- 572 Harris, P. A., Taylor, R., Minor, B. L., Elliott, V., Fernandez, M., O'Neal, L., . . . Kirby, J.  
573 (2019). The REDCap consortium: Building an international community of software  
574 platform partners. *Journal of Biomedical Informatics*, 95, 103208.
- 575 Harris, P. A., Taylor, R., Thielke, R., Payne, J., Gonzalez, N., & Conde, J. G. (2009). Research  
576 electronic data capture (REDCap)—a metadata-driven methodology and workflow  
577 process for providing translational research informatics support. *Journal of Biomedical*  
578 *Informatics*, 42(2), 377-381.
- 579 Harvey, N. D. (2021). How Old Is My Dog? Identification of Rational Age Groupings in Pet  
580 Dogs Based Upon Normative Age-Linked Processes. *Frontiers in Veterinary Science*,  
581 8(321). doi:10.3389/fvets.2021.643085
- 582 Head, E. (2011). Neurobiology of the aging dog. *Age*, 33(3), 485-496.
- 583 Head, E. (2013). A canine model of human aging and Alzheimer's disease. *Biochim Biophys*  
584 *Acta*, 1832(9), 1384-1389.
- 585 Heath, S. E., Barabas, S., & Craze, P. G. (2007). Nutritional supplementation in cases of canine  
586 cognitive dysfunction—A clinical trial. *Applied Animal Behaviour Science*, 105(4), 284-  
587 296.
- 588 Hobbs, S. L., Law, T. H., Volk, H. A., Younis, C., Casey, R. A., & Packer, R. M. (2020). Impact  
589 of canine epilepsy on judgement and attention biases. *Scientific reports*, 10(1), 1-11.
- 590 Hoffman, J. M., Creevy, K. E., Franks, A., O'Neill, D. G., & Promislow, D. E. (2018). The  
591 companion dog as a model for human aging and mortality. *Aging cell*, 17(3), e12737.
- 592 Hwang, P. H., Longstreth Jr, W., Brenowitz, W. D., Thielke, S. M., Lopez, O. L., Francis, C. E.,  
593 . . . Fitzpatrick, A. L. (2020). Dual sensory impairment in older adults and risk of  
594 dementia from the GEM Study. *Alzheimer's & Dementia: Diagnosis, Assessment &*  
595 *Disease Monitoring*, 12(1), e12054.
- 596 Jahangiri, Z., Gholamnezhad, Z., & Hosseini, M. (2019). Neuroprotective effects of exercise in  
597 rodent models of memory deficit and Alzheimer's. *Metabolic Brain Disease*, 34(1), 21-  
598 37.
- 599 Jankowsky, J. L., & Zheng, H. (2017). Practical considerations for choosing a mouse model of  
600 Alzheimer's disease. *Molecular neurodegeneration*, 12(1), 1-22.
- 601 Kaeberlein, M., Creevy, K. E., & Promislow, D. E. (2016). The dog aging project: translational  
602 geroscience in companion animals. *Mammalian genome*, 27(7), 279-288.



- 603 Kramer, A. F., Bherer, L., Colcombe, S. J., Dong, W., & Greenough, W. T. (2004).  
604 Environmental influences on cognitive and brain plasticity during aging. *The Journals of*  
605 *Gerontology Series A: Biological Sciences and Medical Sciences*, 59(9), M940-M957.
- 606 Lautenschlager, N. T., Cox, K. L., Flicker, L., Foster, J. K., Van Bockxmeer, F. M., Xiao, J., . . .  
607 Almeida, O. P. (2008). Effect of physical activity on cognitive function in older adults at  
608 risk for Alzheimer disease: a randomized trial. *Jama*, 300(9), 1027-1037.
- 609 Luo, Y., He, P., Guo, C., Chen, G., Li, N., & Zheng, X. (2018). Association between sensory  
610 impairment and dementia in older adults: evidence from China. *Journal of the American*  
611 *Geriatrics Society*, 66(3), 480-486.
- 612 Mad'ari, A., Farbakova, J., & Žilka, N. (2017). Preventive and risk factors of canine dementia. In  
613 *Canine and Feline Dementia* (pp. 145-154): Springer.
- 614 Maharani, A., Dawes, P., Nazroo, J., Tampubolon, G., & Pendleton, N. (2020). Associations  
615 between self-reported sensory impairment and risk of cognitive decline and impairment  
616 in the Health and Retirement Study cohort. *The Journals of Gerontology: Series B*, 75(6),  
617 1230-1242.
- 618 Marx, J. (2005). Preventing Alzheimer's: a lifelong commitment? Recent research suggests that  
619 keeping mentally and physically active when young and middle-aged can help stave off  
620 the brain degeneration of Alzheimer's. *Science*, 309(5736), 864-867.
- 621 McCarthy, G., O'Donovan, J., Jones, B., McAllister, H., Seed, M., & Mooney, C. (2007).  
622 Randomised double-blind, positive-controlled trial to assess the efficacy of  
623 glucosamine/chondroitin sulfate for the treatment of dogs with osteoarthritis. *The*  
624 *Veterinary Journal*, 174(1), 54-61.
- 625 Milgram, N. W., Head, E., Zicker, S., Ikeda-Douglas, C., Murphey, H., Muggenburg, B., . . .  
626 Cotman, C. (2005). Learning ability in aged beagle dogs is preserved by behavioral  
627 enrichment and dietary fortification: a two-year longitudinal study. *Neurobiology of*  
628 *Aging*, 26(1), 77-90.
- 629 Milgram, N. W., Head, E., Zicker, S. C., Ikeda-Douglas, C., Murphey, H., Muggenburg, B. A., . . .  
630 Cotman, C. W. (2004). Long-term treatment with antioxidants and a program of  
631 behavioral enrichment reduces age-dependent impairment in discrimination and reversal  
632 learning in beagle dogs. *Experimental gerontology*, 39(5), 753-765.
- 633 Milgram, N. W., Siwak-Tapp, C. T., Araujo, J., & Head, E. (2006). Neuroprotective effects of  
634 cognitive enrichment. *Ageing research reviews*, 5(3), 354-369.
- 635 Nolan, J. M., Mulcahy, R., Power, R., Moran, R., & Howard, A. N. (2018). Nutritional  
636 intervention to prevent Alzheimer's disease: Potential benefits of xanthophyll carotenoids  
637 and omega-3 fatty acids combined. *Journal of Alzheimer's Disease*, 64(2), 367-378.
- 638 Packer, R. M., McGreevy, P. D., Salvin, H. E., Valenzuela, M. J., Chaplin, C. M., & Volk, H. A.  
639 (2018). Cognitive dysfunction in naturally occurring canine idiopathic epilepsy. *PloS*  
640 *one*, 13(2), e0192182.
- 641 Pan, Y., Kennedy, A. D., Jönsson, T. J., & Milgram, N. W. (2018). Cognitive enhancement in  
642 old dogs from dietary supplementation with a nutrient blend containing arginine,  
643 antioxidants, B vitamins and fish oil. *British Journal of Nutrition*, 119(3), 349-358.
- 644 Pan, Y., Landsberg, G., Mougeot, I., Kelly, S., Xu, H., Bhatnagar, S., . . . Milgram, N. W.  
645 (2018). Efficacy of a Therapeutic Diet on Dogs With Signs of Cognitive Dysfunction  
646 Syndrome (CDS): A Prospective Double Blinded Placebo Controlled Clinical Study.  
647 *Frontiers in Nutrition*, 5. doi:10.3389/fnut.2018.00127

- 648 R Development Core Team. (2016). R: a language and environment for statistical computing.  
649 Vienna, Austria: R Foundation for Statistical Computing. Retrieved from [http://www.R-](http://www.R-project.org)  
650 [project.org](http://www.R-project.org)
- 651 Raichlen, D. A., & Alexander, G. E. (2017). Adaptive capacity: an evolutionary neuroscience  
652 model linking exercise, cognition, and brain health. *Trends in neurosciences*, *40*(7), 408-  
653 421.
- 654 Raichlen, D. A., Bharadwaj, P. K., Nguyen, L. A., Franchetti, M. K., Zigman, E. K., Solorio, A.  
655 R., & Alexander, G. E. (2020). Effects of simultaneous cognitive and aerobic exercise  
656 training on dual-task walking performance in healthy older adults: results from a pilot  
657 randomized controlled trial. *BMC Geriatrics*, *20*(1), 1-10.
- 658 Rhyu, I., Bytheway, J., Kohler, S., Lange, H., Lee, K., Boklewski, J., . . . Greenough, W. (2010).  
659 Effects of aerobic exercise training on cognitive function and cortical vascularity in  
660 monkeys. *Neuroscience*, *167*(4), 1239-1248.
- 661 Ruehl, W., Bruyette, D., DePaoli, A., Cotman, C., Head, E., Milgram, N. W., & Cummings, B.  
662 (1995). Canine cognitive dysfunction as a model for human age-related cognitive decline,  
663 dementia and Alzheimer's disease: clinical presentation, cognitive testing, pathology and  
664 response to 1-deprenyl therapy. *Progress in Brain Research*, *106*, 217-225.
- 665 Salvin, H. E., McGreevy, P. D., Sachdev, P. S., & Valenzuela, M. J. (2011). The canine  
666 cognitive dysfunction rating scale (CCDR): a data-driven and ecologically relevant  
667 assessment tool. *The Veterinary Journal*, *188*(3), 331-336.
- 668 Santos-Lozano, A., Pareja-Galeano, H., Sanchis-Gomar, F., Quindós-Rubial, M., Fiuza-Luces,  
669 C., Cristi-Montero, C., . . . Lucia, A. (2016). *Physical activity and Alzheimer disease: a*  
670 *protective association*. Paper presented at the Mayo Clinic Proceedings.
- 671 Singhrao, S. K., Harding, A., Poole, S., Kesavalu, L., & Crean, S. (2015). Porphyromonas  
672 gingivalis periodontal infection and its putative links with Alzheimer's disease.  
673 *Mediators of inflammation*, *2015*.
- 674 Sofi, F., Valecchi, D., Bacci, D., Abbate, R., Gensini, G. F., Casini, A., & Macchi, C. (2011).  
675 Physical activity and risk of cognitive decline: a meta-analysis of prospective studies.  
676 *Journal of internal medicine*, *269*(1), 107-117.
- 677 Studzinski, C. M., Christie, L.-A., Araujo, J. A., Burnham, W. M., Head, E., Cotman, C. W., &  
678 Milgram, N. W. (2006). Visuospatial function in the beagle dog: an early marker of  
679 cognitive decline in a model of human aging and dementia. *Neurobiology of learning and*  
680 *memory*, *86*(2), 197-204.
- 681 Szabó, D., Miklósi, Á., & Kubinyi, E. (2018). Owner reported sensory impairments affect  
682 behavioural signs associated with cognitive decline in dogs. *Behavioural processes*, *157*,  
683 354-360.
- 684 Urfer, S. R., Darvas, M., Czeibert, K., Sándor, S., Promislow, D. E., Creevy, K. E., . . .  
685 Kaerberlein, M. (2021). Canine Cognitive Dysfunction (CCD) scores correlate with  
686 amyloid beta 42 levels in dog brain tissue. *GeroScience*, *43*(5), 2379-2386.
- 687 van de Rest, O., Geleijnse, J. M., Kok, F. J., van Staveren, W. A., Dullemeijer, C., OldeRikkert,  
688 M. G., . . . De Groot, C. (2008). Effect of fish oil on cognitive performance in older  
689 subjects: a randomized, controlled trial. *Neurology*, *71*(6), 430-438.
- 690 Van Praag, H., Shubert, T., Zhao, C., & Gage, F. H. (2005). Exercise enhances learning and  
691 hippocampal neurogenesis in aged mice. *Journal of Neuroscience*, *25*(38), 8680-8685.
- 692 Watson, F., Packer, R. M. A., Rusbridge, C., & Volk, H. A. (2020). Behavioural changes in dogs  
693 with idiopathic epilepsy. *Veterinary Record*, *186*(3), 93-93.

- 694 Webster, S. J., Bachstetter, A. D., Nelson, P. T., Schmitt, F. A., & Van Eldik, L. J. (2014). Using  
695 mice to model Alzheimer's dementia: an overview of the clinical disease and the  
696 preclinical behavioral changes in 10 mouse models. *Frontiers in genetics*, *5*, 88.
- 697 Winter, J., Packer, R. M. A., & Volk, H. A. (2018). Preliminary assessment of cognitive  
698 impairments in canine idiopathic epilepsy. *Veterinary Record*, *182*(22), 633-633.
- 699 Xu, W., Tan, L., Wang, H.-F., Tan, M.-S., Tan, L., Li, J.-Q., . . . Yu, J.-T. (2016). Education and  
700 risk of dementia: dose-response meta-analysis of prospective cohort studies. *Molecular*  
701 *Neurobiology*, *53*(5), 3113-3123.
- 702 Xu, W., Wang, H. F., Wan, Y., Tan, C.-C., Yu, J.-T., & Tan, L. (2017). Leisure time physical  
703 activity and dementia risk: a dose-response meta-analysis of prospective studies. *BMJ*  
704 *open*, *7*(10), e014706.
- 705 Yarborough, S. (2021). *Evaluation of Cognitive Function in the Dog Aging Project: Associations*  
706 *with Baseline Canine Characteristics*. University of Washington,
- 707 Yu, J.-T., Xu, W., Tan, C.-C., Andrieu, S., Suckling, J., Evangelou, E., . . . Feng, L. (2020).  
708 Evidence-based prevention of Alzheimer's disease: systematic review and meta-analysis  
709 of 243 observational prospective studies and 153 randomised controlled trials. *Journal of*  
710 *Neurology, Neurosurgery & Psychiatry*, *91*(11), 1201-1209.

711

712

713

714

715

716

717

718

719

720

721

722

723

724

725

726

727

### Dog Aging Project Consortium Authors

728 Joshua M. Akey<sup>1</sup>, Brooke Benton<sup>2</sup>, Elhanan Borenstein<sup>3,4,5</sup>, Marta G. Castelhan<sup>6</sup>, Amanda E.  
729 Coleman<sup>7</sup>, Kate E. Creevy<sup>8</sup>, Kyle Crowder<sup>9,10</sup>, Matthew D. Dunbar<sup>10</sup>, Virginia R. Fajt<sup>11</sup>, Annette  
730 L. Fitzpatrick<sup>12,13,14</sup>, Unity Jeffrey<sup>15</sup>, Erica C. Jonlin<sup>2,16</sup>, Matt Kaerberlein<sup>2</sup>, Elinor K.  
731 Karlsson<sup>17,18</sup>, Kathleen F. Kerr<sup>19</sup>, Jonathan M. Levine<sup>8</sup>, Jing Ma<sup>20</sup>, Robyn McClelland<sup>19</sup>, Audrey  
732 Ruple<sup>21</sup>, Stephen M. Schwartz<sup>13,22</sup>, Sandi Shrager<sup>23</sup>, Noah Snyder-Mackler<sup>24,25,26</sup>, M. Katherine  
733 Tolbert<sup>8</sup>, Silvan R. Urfer<sup>2</sup>, Benjamin S. Wilfond<sup>27,28</sup>

734 <sup>1</sup>Lewis-Sigler Institute for Integrative Genomics, Princeton University, Princeton, NJ, USA

735 <sup>2</sup>Department of Laboratory Medicine and Pathology, University of Washington School of  
736 Medicine, Seattle, WA, USA

737 <sup>3</sup>Department of Clinical Microbiology and Immunology, Sackler Faculty of Medicine, Tel Aviv  
738 University, Tel Aviv, Israel

739 <sup>4</sup>Blavatnik School of Computer Science, Tel Aviv University, Tel Aviv, Israel

740 <sup>5</sup>Santa Fe Institute, Santa Fe, NM, USA

741 <sup>6</sup>Cornell Veterinary Biobank, College of Veterinary Medicine, Cornell University, Ithaca, NY,  
742 USA

743 <sup>7</sup>Department of Small Animal Medicine and Surgery, College of Veterinary Medicine,  
744 University of Georgia, Athens, GA, USA

745 <sup>8</sup>Department of Small Animal Clinical Sciences, Texas A&M University College of Veterinary  
746 Medicine & Biomedical Sciences, College Station, TX, USA

747 <sup>9</sup>Department of Sociology, University of Washington, Seattle, WA, USA

748 <sup>10</sup>Center for Studies in Demography and Ecology, University of Washington, Seattle, WA, USA

749 <sup>11</sup>Department of Veterinary Physiology and Pharmacology, Texas A&M University College of  
750 Veterinary Medicine & Biomedical Sciences, College Station, TX, USA

751 <sup>12</sup>Department of Family Medicine, University of Washington, Seattle, WA, USA

752 <sup>13</sup>Department of Epidemiology, University of Washington, Seattle, WA, USA

753 <sup>14</sup>Department of Global Health, University of Washington, Seattle, WA, USA

754 <sup>15</sup>Department of Veterinary Pathobiology, Texas A&M University College of Veterinary  
755 Medicine & Biomedical Sciences, College Station, TX, USA

756 <sup>16</sup>Institute for Stem Cell and Regenerative Medicine, University of Washington, Seattle, WA,  
757 USA

758 <sup>17</sup>Bioinformatics and Integrative Biology, University of Massachusetts Chan Medical School,  
759 Worcester, MA, USA

760 <sup>18</sup>Broad Institute of MIT and Harvard, Cambridge, MA, USA

761 <sup>19</sup>Department of Biostatistics, University of Washington, Seattle, WA, USA

762 <sup>20</sup>Division of Public Health Sciences, Fred Hutchinson Cancer Research Center, Seattle, WA,  
763 USA

764 <sup>21</sup>Department of Population Health Sciences, Virginia-Maryland College of Veterinary  
765 Medicine, Virginia Tech, Blacksburg, VA, USA

766 <sup>22</sup>Epidemiology Program, Fred Hutchinson Cancer Research Center, Seattle, WA, USA

767 <sup>23</sup>Department of Biostatistics, Collaborative Health Studies Coordinating Center, University of  
768 Washington, Seattle, WA, USA

769 <sup>24</sup>School of Life Sciences, Arizona State University, Tempe, AZ, USA

770 <sup>25</sup>Center for Evolution and Medicine, Arizona State University, Tempe, AZ, USA

771 <sup>26</sup>School for Human Evolution and Social Change, Arizona State University, Tempe, AZ, USA

772 <sup>27</sup>Treuman Katz Center for Pediatric Bioethics, Seattle Children's Research Institute, Seattle,  
773 WA, USA

774 <sup>28</sup>Department of Pediatrics, Division of Bioethics and Palliative Care, University of Washington  
775 School of Medicine, Seattle, WA, USA

776

777

778

779

780

781

782

783

784

785

786

**Tables**

787 **Table 1. Summary statistics of our sample.**

| Variable                   | Canine Cognitive Dysfunction<br>Case (score $\geq 50$ ) |       |       | Canine Cognitive Dysfunction<br>Control (score $< 50$ ) |       |       |
|----------------------------|---------------------------------------------------------|-------|-------|---------------------------------------------------------|-------|-------|
|                            | N                                                       | Mean  | SD    | N                                                       | Mean  | SD    |
| age                        | 287                                                     | 14.15 | 2.32  | 11287                                                   | 10.10 | 2.61  |
| sex                        | 287                                                     |       |       | 11287                                                   |       |       |
| ... female intact          | 3                                                       | 1%    |       | 85                                                      | 1%    |       |
| ... female spayed          | 133                                                     | 46%   |       | 5668                                                    | 50%   |       |
| ... male intact            | 7                                                       | 2%    |       | 304                                                     | 3%    |       |
| ... male neutered          | 144                                                     | 50%   |       | 5230                                                    | 46%   |       |
| dog weight (lbs)           | 287                                                     | 33.56 | 24.73 | 11287                                                   | 48.9  | 28.57 |
| physical activity          | 287                                                     | -0.79 | 0.83  | 11287                                                   | 0.02  | 1     |
| training history           | 287                                                     | -0.21 | 0.78  | 11287                                                   | 0.01  | 1     |
| neurological               | 287                                                     | 0.18  | 0.38  | 11287                                                   | 0.07  | 0.25  |
| periodontal                | 287                                                     | 0.37  | 0.48  | 11287                                                   | 0.24  | 0.43  |
| exercise intolerance       | 287                                                     | 0.13  | 0.34  | 11287                                                   | 0.07  | 0.25  |
| orthopedic                 | 287                                                     | 0.41  | 0.49  | 11287                                                   | 0.21  | 0.41  |
| sensory impairment         | 287                                                     | 0.63  | 0.48  | 11287                                                   | 0.13  | 0.34  |
| neuroprotective supplement | 287                                                     | 0.37  | 0.48  | 11287                                                   | 0.37  | 0.48  |
| joint supplement           | 287                                                     | 0.45  | 0.50  | 11287                                                   | 0.40  | 0.49  |
| endocrine                  | 287                                                     | 0.13  | 0.34  | 11287                                                   | 0.05  | 0.22  |
| kidney                     | 287                                                     | 0.09  | 0.28  | 11287                                                   | 0.01  | 0.12  |
| cancer                     | 287                                                     | 0.17  | 0.38  | 11287                                                   | 0.09  | 0.29  |
| liver                      | 287                                                     | 0.02  | 0.14  | 11287                                                   | 0.01  | 0.08  |

788

789

790

791

**Table 2. Model comparisons between the three tiers of models predicting symptom severity, reporting the beta coefficients and the 95% confidence interval based on robust standard errors in parentheses. Age effects are shown in Fig 1.**

| Parameter            | Symptom Severity           |         |                            |         |                            |         |
|----------------------|----------------------------|---------|----------------------------|---------|----------------------------|---------|
|                      | Minimally Adjusted         |         | Moderately Adjusted        |         | Fully Adjusted             |         |
|                      | Beta (95% CI) <sup>1</sup> | p-value | Beta (95% CI) <sup>1</sup> | p-value | Beta (95% CI) <sup>1</sup> | p-value |
| physical activity    | -0.116 (-0.134 to -0.098)  | <0.001  | -0.096 (-0.114 to -0.079)  | <0.001  | -0.095 (-0.113 to -0.077)  | <0.001  |
| dog weight (lbs)     | 0.000 (-0.001 to 0.000)    | 0.123   | 0.000 (-0.001 to 0.001)    | 0.720   | 0.000 (-0.001 to 0.001)    | 0.941   |
| sex                  |                            |         |                            |         |                            |         |
| female intact        | —                          |         | —                          |         | —                          |         |
| female spayed        | 0.238 (0.056 to 0.419)     | 0.010   | 0.198 (0.020 to 0.376)     | 0.029   | 0.195 (0.018 to 0.373)     | 0.031   |
| male intact          | 0.208 (0.004 to 0.411)     | 0.046   | 0.171 (-0.029 to 0.372)    | 0.093   | 0.170 (-0.030 to 0.370)    | 0.096   |
| male neutered        | 0.290 (0.108 to 0.471)     | 0.002   | 0.244 (0.066 to 0.422)     | 0.007   | 0.243 (0.066 to 0.420)     | 0.007   |
| owner age            |                            |         |                            |         |                            |         |
| 18-24                | —                          |         | —                          |         | —                          |         |
| 25-34                | -0.348 (-0.567 to -0.129)  | 0.002   | -0.336 (-0.545 to -0.127)  | 0.002   | -0.334 (-0.542 to -0.125)  | 0.002   |
| 35-44                | -0.578 (-0.794 to -0.362)  | <0.001  | -0.556 (-0.762 to -0.350)  | <0.001  | -0.554 (-0.759 to -0.348)  | <0.001  |
| 45-54                | -0.725 (-0.939 to -0.510)  | <0.001  | -0.710 (-0.915 to -0.505)  | <0.001  | -0.707 (-0.911 to -0.503)  | <0.001  |
| 55-64                | -0.876 (-1.09 to -0.664)   | <0.001  | -0.861 (-1.06 to -0.658)   | <0.001  | -0.856 (-1.06 to -0.654)   | <0.001  |
| 65-74                | -0.99 (-1.20 to -0.774)    | <0.001  | -0.97 (-1.18 to -0.772)    | <0.001  | -0.97 (-1.17 to -0.767)    | <0.001  |
| 75 and older         | -1.07 (-1.29 to -0.852)    | <0.001  | -1.05 (-1.26 to -0.844)    | <0.001  | -1.05 (-1.25 to -0.839)    | <0.001  |
| sensory impairment   |                            |         | 0.408 (0.351 to 0.464)     | <0.001  | 0.405 (0.349 to 0.461)     | <0.001  |
| orthopedic           |                            |         | 0.087 (0.044 to 0.130)     | <0.001  | 0.084 (0.041 to 0.127)     | <0.001  |
| exercise intolerance |                            |         | 0.045 (-0.020 to 0.111)    | 0.177   | 0.043 (-0.023 to 0.108)    | 0.203   |
| neurological         |                            |         | 0.076 (0.008 to 0.143)     | 0.028   | 0.073 (0.005 to 0.140)     | 0.035   |
| periodontal          |                            |         | 0.063 (0.024 to 0.101)     | 0.002   | 0.060 (0.021 to 0.099)     | 0.003   |

|                            |        |                           |        |                           |        |
|----------------------------|--------|---------------------------|--------|---------------------------|--------|
| liver                      |        | 0.041 (-0.182 to 0.264)   | 0.720  | 0.030 (-0.193 to 0.253)   | 0.790  |
| joint supplement           |        | -0.032 (-0.074 to 0.009)  | 0.125  | -0.031 (-0.073 to 0.010)  | 0.139  |
| neuroprotective supplement |        | -0.078 (-0.119 to -0.038) | <0.001 | -0.082 (-0.123 to -0.042) | <0.001 |
| training history           |        | -0.031 (-0.047 to -0.014) | <0.001 | -0.031 (-0.047 to -0.014) | <0.001 |
| endocrine                  |        |                           |        | 0.085 (0.009 to 0.161)    | 0.029  |
| kidney                     |        |                           |        | 0.112 (-0.025 to 0.248)   | 0.109  |
| cancer                     |        |                           |        | 0.057 (0.001 to 0.113)    | 0.047  |
| AIC                        | 30,326 | 30,010                    |        | 30,003                    |        |

<sup>1</sup> CI = Confidence Interval

792

793

794

795

796

797

798



799 **Table 3. Model comparisons between the three tiers of models predicting cognitive decline in previous six months, reporting**  
 800 **the beta coefficients and the 95% confidence interval based on robust standard errors in parentheses. Age effects are shown in**  
 801 **Fig 1.**

| Parameter            | Symptom Change; Previous 6 Months |         |                            |         |                            |         |
|----------------------|-----------------------------------|---------|----------------------------|---------|----------------------------|---------|
|                      | Minimally Adjusted                |         | Moderately Adjusted        |         | Fully Adjusted             |         |
|                      | Beta (95% CI) <sup>1</sup>        | p-value | Beta (95% CI) <sup>1</sup> | p-value | Beta (95% CI) <sup>1</sup> | p-value |
| physical activity    | -0.086 (-0.104 to -0.068)         | <0.001  | -0.070 (-0.089 to -0.052)  | <0.001  | -0.069 (-0.087 to -0.051)  | <0.001  |
| dog weight (lbs)     | 0.001 (0.000 to 0.002)            | <0.001  | 0.001 (0.000 to 0.002)     | 0.001   | 0.001 (0.000 to 0.002)     | 0.004   |
| sex                  |                                   |         |                            |         |                            |         |
| female intact        | —                                 |         | —                          |         | —                          |         |
| female spayed        | 0.114 (-0.089 to 0.318)           | 0.271   | 0.074 (-0.126 to 0.274)    | 0.469   | 0.072 (-0.127 to 0.272)    | 0.479   |
| male intact          | 0.044 (-0.184 to 0.272)           | 0.704   | 0.008 (-0.217 to 0.232)    | 0.947   | 0.008 (-0.215 to 0.232)    | 0.942   |
| male neutered        | 0.126 (-0.078 to 0.330)           | 0.225   | 0.082 (-0.118 to 0.283)    | 0.421   | 0.082 (-0.118 to 0.282)    | 0.421   |
| owner age            |                                   |         |                            |         |                            |         |
| 18-24                | —                                 |         | —                          |         | —                          |         |
| 25-34                | -0.034 (-0.358 to 0.290)          | 0.835   | -0.037 (-0.357 to 0.283)   | 0.820   | -0.033 (-0.353 to 0.286)   | 0.839   |
| 35-44                | -0.067 (-0.389 to 0.255)          | 0.684   | -0.063 (-0.382 to 0.255)   | 0.696   | -0.060 (-0.378 to 0.258)   | 0.713   |
| 45-54                | -0.038 (-0.359 to 0.283)          | 0.815   | -0.038 (-0.355 to 0.279)   | 0.815   | -0.033 (-0.349 to 0.284)   | 0.841   |
| 55-64                | -0.019 (-0.339 to 0.301)          | 0.907   | -0.018 (-0.334 to 0.298)   | 0.911   | -0.010 (-0.326 to 0.305)   | 0.949   |
| 65-74                | -0.081 (-0.401 to 0.239)          | 0.618   | -0.086 (-0.402 to 0.230)   | 0.595   | -0.077 (-0.393 to 0.238)   | 0.632   |
| 75 and older         | -0.112 (-0.437 to 0.212)          | 0.498   | -0.103 (-0.424 to 0.218)   | 0.528   | -0.095 (-0.415 to 0.226)   | 0.562   |
| sensory impairment   |                                   |         | 0.233 (0.169 to 0.297)     | <0.001  | 0.230 (0.166 to 0.294)     | <0.001  |
| orthopedic           |                                   |         | 0.156 (0.108 to 0.204)     | <0.001  | 0.153 (0.106 to 0.201)     | <0.001  |
| exercise intolerance |                                   |         | 0.056 (-0.019 to 0.132)    | 0.146   | 0.054 (-0.021 to 0.130)    | 0.161   |
| neurological         |                                   |         | 0.089 (0.013 to 0.165)     | 0.021   | 0.087 (0.011 to 0.163)     | 0.025   |
| periodontal          |                                   |         | 0.066 (0.023 to 0.108)     | 0.003   | 0.063 (0.020 to 0.106)     | 0.004   |

|                            |        |  |                           |       |                           |       |
|----------------------------|--------|--|---------------------------|-------|---------------------------|-------|
| liver                      |        |  | -0.012 (-0.289 to 0.265)  | 0.930 | -0.023 (-0.298 to 0.253)  | 0.872 |
| joint supplement           |        |  | 0.015 (-0.029 to 0.059)   | 0.504 | 0.016 (-0.028 to 0.060)   | 0.477 |
| neuroprotective supplement |        |  | 0.001 (-0.042 to 0.044)   | 0.972 | -0.003 (-0.046 to 0.040)  | 0.888 |
| training history           |        |  | -0.021 (-0.039 to -0.004) | 0.016 | -0.021 (-0.039 to -0.004) | 0.016 |
| endocrine                  |        |  |                           |       | 0.033 (-0.056 to 0.122)   | 0.464 |
| kidney                     |        |  |                           |       | 0.089 (-0.091 to 0.268)   | 0.333 |
| cancer                     |        |  |                           |       | 0.106 (0.043 to 0.170)    | 0.001 |
| AIC                        | 31,513 |  | 31,365                    |       | 31,356                    |       |

<sup>1</sup> CI = Confidence Interval

802

803

804

805

806

807

808

809

810

811

812

813 **Table 4. Model comparisons between the three tiers of models predicting CCD status, reporting the odds ratio and the 95%**  
 814 **confidence interval in parentheses. Age effects are shown in Fig 1.**

815

| Parameter                  | Canine Cognitive Dysfunction (Clinical Cutoff) |         |                          |         |                          |         |
|----------------------------|------------------------------------------------|---------|--------------------------|---------|--------------------------|---------|
|                            | Minimally Adjusted                             |         | Moderately Adjusted      |         | Fully Adjusted           |         |
|                            | OR (95% CI) <sup>1</sup>                       | p-value | OR (95% CI) <sup>1</sup> | p-value | OR (95% CI) <sup>1</sup> | p-value |
| physical activity          | 0.51 (0.43 to 0.60)                            | <0.001  | 0.53 (0.45 to 0.62)      | <0.001  | 0.53 (0.45 to 0.63)      | <0.001  |
| dog weight (lbs)           | 0.99 (0.99 to 1.00)                            | 0.003   | 0.99 (0.99 to 1.00)      | 0.008   | 0.99 (0.99 to 1.00)      | 0.006   |
| dog sex                    |                                                |         |                          |         |                          |         |
| male                       | —                                              |         | —                        |         | —                        |         |
| female                     | 0.85 (0.66 to 1.09)                            | 0.198   | 0.85 (0.65 to 1.09)      | 0.202   | 0.83 (0.64 to 1.07)      | 0.152   |
| owner age                  |                                                |         |                          |         |                          |         |
| 18-54                      | —                                              |         | —                        |         | —                        |         |
| 55 and older               | 0.78 (0.61 to 1.01)                            | 0.062   | 0.75 (0.58 to 0.97)      | 0.029   | 0.78 (0.60 to 1.02)      | 0.070   |
| sensory impairment         |                                                |         | 3.23 (2.45 to 4.28)      | <0.001  | 3.20 (2.43 to 4.24)      | <0.001  |
| orthopedic                 |                                                |         | 1.22 (0.92 to 1.61)      | 0.160   | 1.22 (0.92 to 1.62)      | 0.162   |
| exercise intolerance       |                                                |         | 0.98 (0.66 to 1.43)      | 0.928   | 0.97 (0.65 to 1.42)      | 0.887   |
| neurological               |                                                |         | 1.31 (0.91 to 1.86)      | 0.137   | 1.29 (0.89 to 1.84)      | 0.162   |
| periodontal                |                                                |         | 0.80 (0.60 to 1.05)      | 0.105   | 0.78 (0.59 to 1.02)      | 0.076   |
| joint supplement           |                                                |         | 0.96 (0.70 to 1.32)      | 0.822   | 1.00 (0.72 to 1.37)      | 0.979   |
| neuroprotective supplement |                                                |         | 1.02 (0.74 to 1.40)      | 0.898   | 0.97 (0.71 to 1.34)      | 0.872   |
| training history           |                                                |         | 0.89 (0.75 to 1.04)      | 0.174   | 0.88 (0.74 to 1.03)      | 0.133   |
| endocrine                  |                                                |         |                          |         | 1.46 (0.97 to 2.16)      | 0.062   |
| kidney                     |                                                |         |                          |         | 1.85 (1.09 to 3.04)      | 0.017   |
| cancer                     |                                                |         |                          |         | 1.15 (0.80 to 1.61)      | 0.437   |
| AIC                        | 1,977                                          |         | 1,911                    |         | 1,908                    |         |

<sup>1</sup>OR = Odds Ratio, CI = Confidence Interval

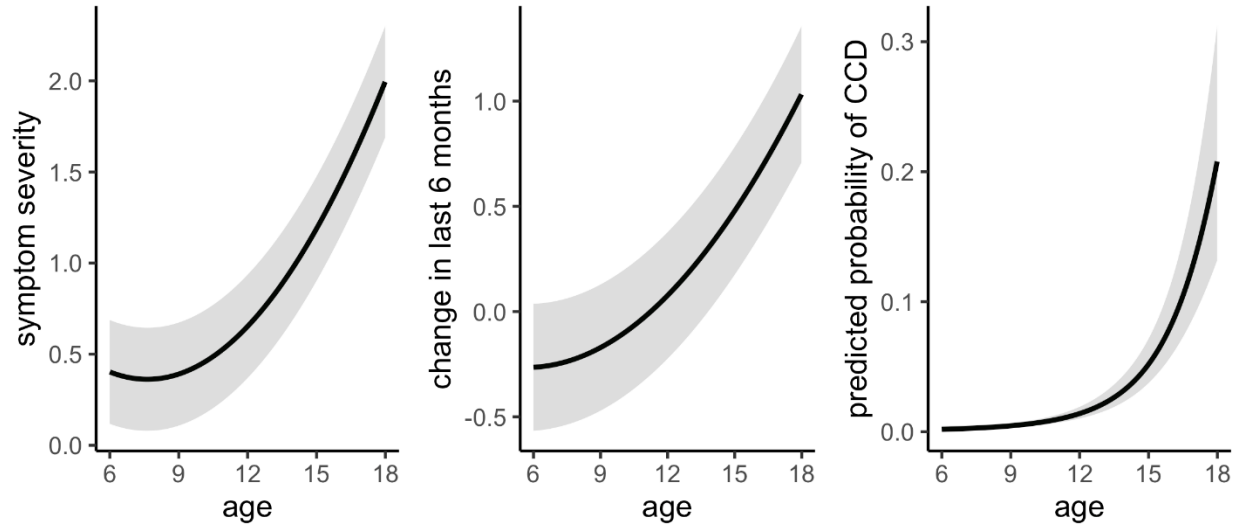

816

817 **Fig 1.** The estimated association between age and symptom severity (PCA-derived score),  
818 symptom change in last 6 months (PCA-derived score), and probability of a CCD diagnosis,  
819 respectively (with 95% confidence intervals indicated in gray). Results are from our fully  
820 adjusted models and include both linear and quadratic terms for age.

Physical activity and cognitive dysfunction associations 29

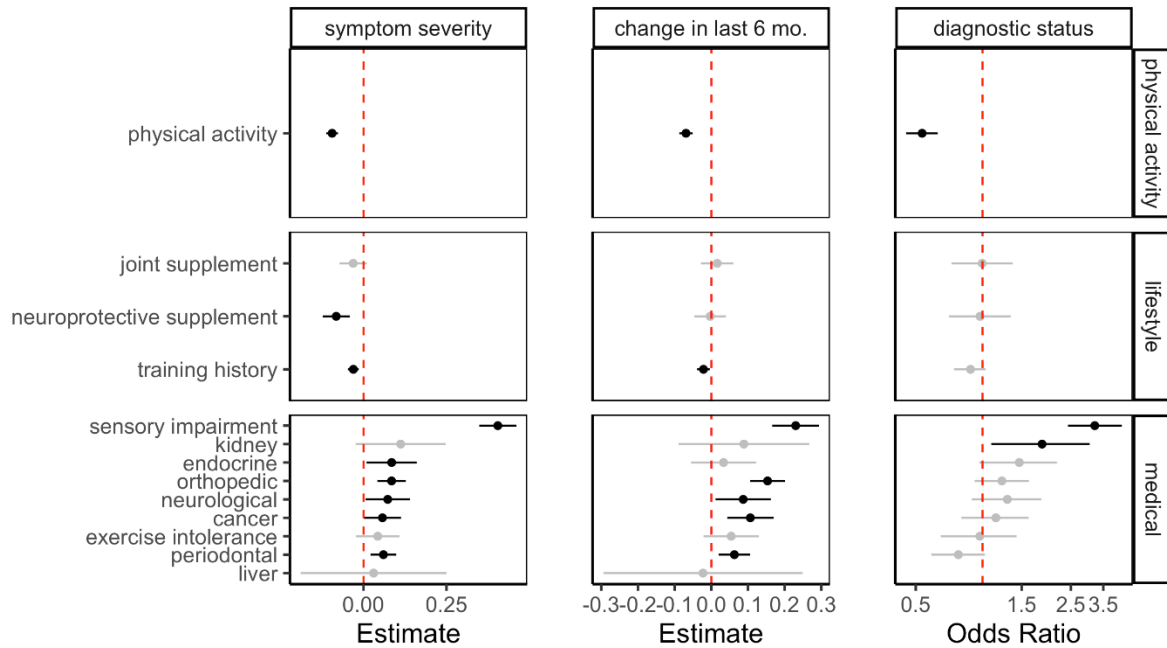

821

822 **Fig 2.** The beta coefficients (for the severity and change models) and odds ratios (for the CCD  
 823 diagnosis model) of physical activity, as well as the other lifestyle (joint supplement,  
 824 neuroprotective supplement, training history) and medical (sensory impairment, kidney,  
 825 endocrine, orthopedic, neurological, cancer, liver, exercise intolerance, periodontal) covariates  
 826 from the fully adjusted models. The red dotted line indicates the null expectation (i.e., 0 for the  
 827 betas and 1 for the odds ratios). Significant findings are presented in black, while nonsignificant  
 828 findings are presented in gray. The bars represent the 95% confidence intervals.

829
